# Supplementary material
Source: PubMed Central journal article supplement (PMC6636864)
Supplement: Supp_Fig1.pdf [file Supp_Fig1.pdf]

## Supplementary Data

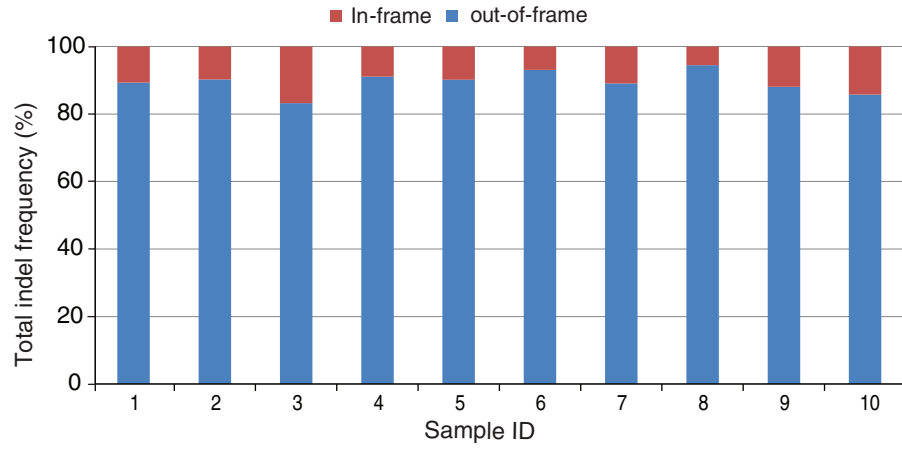

**SUPPLEMENTARY FIG. S1.** Indel profiles from 10 separate experiments. Total percentage of edited alleles carrying in-frame (red) or out-of-frame (blue) indels in P23H het mice injected with SpCas9-VRQR and tru-sgRNA2. Data were analyzed 7 days post injection.
