# Supplementary material
Source: PubMed Central journal article supplement (PMC6636864)
Supplement: Supp_Table1.pdf [file Supp_Table1.pdf]

**Supplementary Table S1. Primer sets and the amplicon sizes**

| <i>Gene name</i> | <i>Forward primer</i>                   | <i>Reverse primer</i>                | <i>Size (bp)</i> |
|------------------|-----------------------------------------|--------------------------------------|------------------|
| <i>Rho-P23H</i>  | 5'-CGA GAG CCG CAG CCA TGA AC-3'        | 5'-CCC AGC ACG ATG AGC AGG AAC-3'    | 166              |
| <i>Setd7</i>     | 5'-GGC AGA GGA ATA CAA GGG ATA G-3'     | 5'-ACG TGT GGT CCA GGT TAA AG-3'     | 200              |
| <i>Gm27760</i>   | 5'-CAG AAT TCA GCC CAG ATC CTT-3'       | 5'-GTC AGG AGA ACT TCA GTC TTG G-3'  | 205              |
| <i>Lars</i>      | 5'-AAA GGC CAC CTG TCT GTT CC-3'        | 5'-GAC TGA CAA GCA GCC AGC TC-3'     | 200              |
| <i>Akt1</i>      | 5'-GTT CTG GCC ATC CAC ACA-3'           | 5'-AGT CCT CTC GGC TTC CT-3'         | 215              |
| <i>Nrxn1</i>     | 5'-CTT TCA TTT GGT TCA TAA GAA CAG C-3' | 5'-CTC ACT GTG TAG AGA GGA AAT CA-3' | 276              |
| <i>Mir3080</i>   | 5'-CTG TCA ACC TGA ACT AAT CAA ACC-3'   | 5'-GCC ACC TAA GCT CAG TTT CT-3'     | 246              |
| <i>Sema5b</i>    | 5'-AAT GGT TGA ATT CCA GCA ACA G-3'     | 5'-GCT CCC TGT GAA ATG AAG ACT A-3'  | 258              |
| <i>Gm37760</i>   | 5'-GTT GTG GTC AGT TGG TCA TTA G-3'     | 5'-GGC TCT ATG TCC CTA TTC TG AG-3'  | 225              |
| <i>AC1277554</i> | 5'-CAC AGT TTC CAC TTG CTT TC-3'        | 5'-GCA TTT GTA AAG CCT GCA T-3'      | 266              |
| <i>Nek10</i>     | 5'-GGA AGA GAA AGG CAC TCA CA-3'        | 5'-CTT AAC ATC CTT CAG CAC CCT A-3'  | 210              |
