# Supplementary material
Source: PubMed Central journal article supplement (PMC6636864)
Supplement: Supp_Table2.pdf [file Supp_Table2.pdf]

**Supplementary Table S2. NGS targeted deep sequencing data of PCR amplicons from injected wild-type, heterozygous, and homozygous P23H retinas and uninjected heterozygous retinas**

| <i>Cas9</i> | <i>sgRNAs</i> | <i>Genotypes</i> | <i>Total pairs</i> | <i>wt pairs</i> | <i>wt allele (%)</i> | <i>P23H pairs</i> | <i>P23H allele (%)</i> | <i>Indel pairs</i> | <i>Indel frequency (%)</i> |
|-------------|---------------|------------------|--------------------|-----------------|----------------------|-------------------|------------------------|--------------------|----------------------------|
| SaCas9-KKH  | sgRNA1        | wt               | 173,761            | 107,771         | 62.0%                | 0                 | 0.0%                   | 65,758             | 37.8%                      |
|             |               | het              | 175,385            | 71,517          | 40.8%                | 34,431            | 19.6%                  | 69,225             | 39.5%                      |
|             |               | hom              | 131,972            | 0               | 0.0%                 | 87,061            | 66.0%                  | 44,674             | 33.9%                      |
| —           | —             | het              | 93,145             | 46,889          | 50.3%                | 45,972            | 49.4%                  | 0                  | 0.0%                       |
| SpCas9-VQR  | sgRNA2        | wt               | 90,126             | 53,833          | 59.7%                | 0                 | 0.0%                   | 36,044             | 40.0%                      |
|             |               | het              | 78,850             | 26,457          | 33.6%                | 11,063            | 14.0%                  | 40,656             | 51.6%                      |
|             |               | hom              | 104,079            | 0               | 0.0%                 | 90,045            | 86.5%                  | 13,605             | 13.1%                      |
| —           | —             | het              | 78,423             | 39,464          | 50.3%                | 38,767            | 49.4%                  | 0                  | 0.0%                       |
| SpCas9-VQR  | tru-sgRNA2    | wt               | 99,930             | 99,375          | 99.4%                | 0                 | 0.0%                   | 184                | 0.2%                       |
|             |               | het              | 94,178             | 50,549          | 53.7%                | 31,265            | 33.2%                  | 12,090             | 12.8%                      |
|             |               | hom              | 97,624             | 0               | 0.0%                 | 70,248            | 72.0%                  | 27,139             | 27.8%                      |
| —           | —             | het              | 113,685            | 56,464          | 49.7%                | 57,012            | 50.1%                  | 0                  | 0.0%                       |
