# Supplementary material
Source: PubMed Central journal article supplement (PMC6636864)
Supplement: Supp_Table3.pdf [file Supp_Table3.pdf]

**Supplementary Table S3. Top 20 out of 2,074 predicted off-target sites of tru-sgRNA2 and SpCas9-VRQR**

| <i>Coordinates (GRCm38/mm10)</i> | <i>MM<sup>a</sup></i> | <i>Target_sequence<sup>b</sup></i> | <i>PAM</i> | <i>Position</i> | <i>Gene name</i>     |
|----------------------------------|-----------------------|------------------------------------|------------|-----------------|----------------------|
| chr6:115932059-115932078         | 1                     | GTGGT[GCGGAGCCCCTT]                | CGA        | Exonic          | <i>Rho</i>           |
| chr3:51534318-51534337           | 2                     | GGTGT[GCGGAGCCACTT]                | GGA        | Intronic        | <i>Setd7</i>         |
| chr15:5877846-5877865            | 1                     | GTGGT[GTGGAGCCACTT]                | TGA        | Intergenic      | <i>Gm27760</i>       |
| chr18:42216853-42216872          | 4                     | ACCCT[GCGGAGCCACTT]                | TGA        | Exonic          | <i>Lars</i>          |
| chr12:112667982-112668001        | 2                     | GTGGG[GCTGAGCCACTT]                | GGA        | Exonic          | <i>Akt1</i>          |
| chr17:90591810-90591829          | 3                     | GAGCT[GAGGAGCCACTT]                | GGA        | Intronic        | <i>Nrxn1</i>         |
| chr15:82952543-82952562          | 4                     | AAGCC[GCGGAGCCACTT]                | TGA        | Intergenic      | <i>Mir3080</i>       |
| chr16:35528273-35528292          | 4                     | CAGTA[GCGGAGCCACTT]                | TGA        | Intergenic      | <i>Sema5b</i>        |
| chr1:91917859-91917878           | 3                     | CTTGT[GCAGAGCCACTT]                | GGA        | Exonic          | <i>Gm37600</i>       |
| chr8:121126629-121126648         | 3                     | ATGGA[GGGGAGCCACTT]                | GGA        | Intronic        | <i>AC127554.1</i>    |
| chr14:14957653-14957672          | 2                     | GTGGT[ACTGAGCCACTT]                | GGA        | Intronic        | <i>Nek10</i>         |
| chr6:28464010-28464029           | 3                     | GTTCT[GGGGAGCCACTT]                | CGA        | Intergenic      | <i>Gm43264</i>       |
| chr1:48454326-48454345           | 3                     | GTAAT[GAGGAGCCACTT]                | TGA        | Intergenic      | <i>Gm23240</i>       |
| chr7:118779695-118779714         | 2                     | GAGGT[GCGGGGCCACTT]                | CGA        | Exonic          | <i>9030624J02Rik</i> |
| chr12:85072399-85072418          | 3                     | TTGGT[TTGGAGCCACTT]                | GGA        | Intergenic      | <i>Ylpm1</i>         |
| chr15:41792995-41793014          | 4                     | AGTGT[GAGGAGCCACTT]                | TGA        | Intronic        | <i>Oxr1</i>          |
| chr16:43727298-43727317          | 4                     | AAAGT[GGGGAGCCACTT]                | TGA        | Intergenic      | <i>Drd3</i>          |
| chr19:38652109-38652128          | 3                     | GAGGT[AAGGAGCCACTT]                | GGA        | Exonic          | <i>Plce1</i>         |
| chr10:114571848-114571867        | 3                     | GAGGT[TGGGAGCCACTT]                | GGA        | Intronic        | <i>Trhde</i>         |
| chr4:22491277-22491296           | 4                     | CAGTT[GGGGAGCCACTT]                | CGA        | Intronic        | <i>RP23-381K3.5</i>  |
| chr4:100378125-100378144         | 3                     | GTAGA[GCAGAGCCACTT]                | TGA        | Intronic        | <i>Gm12706</i>       |

<sup>a</sup>*In silico* predicted off-target sites with one to five mismatches (MM) by CCTop-CRISPR-Cas9 target online predictor using input sequence GTGGTGC GGAGCCACTTCGA and NGA PAM sequence.

<sup>b</sup>The sequences in the brackets are the seed sequences; bold nucleotides indicate mismatched positions.
